# Supplementary material for: Characterizing the solid hydrolysis product, UF4(H2O)2.5, generated from neat water reactions with UF4 at room temperature
Source: Royal Society of Chemistry journal article supplement (doi:10.1039/d0dt03944f), 2021-01-01
Supplement: d0dt03944f1.pdf [file d0dt03944f1.pdf]

# Characterizing the Solid Hydrolysis Product, $\text{UF}_4(\text{H}_2\text{O})_{2.5}$ , Generated from Neat Water Reactions with $\text{UF}_4$ at Room Temperature

Jonathan H. Christian<sup>a</sup>, Christopher Klug<sup>†b</sup>, Michael DeVore II<sup>a</sup>, Eliel Villa-Aleman<sup>a</sup>, Bryan J. Foley<sup>a</sup>,  
Nicholas Groden<sup>a</sup>, A. Taylor Baldwin<sup>a</sup>, Matthew Wellons<sup>a\*</sup>

<sup>a</sup> Savannah River National Laboratory, Aiken, SC 29803

<sup>b</sup> Naval Research Laboratory, Washington, D.C. 20375

\*[Matthew.Wellons@srl.doe.gov](mailto:Matthew.Wellons@srl.doe.gov)

<sup>†</sup>[Christopher.Klug@nrl.navy.mil](mailto:Christopher.Klug@nrl.navy.mil)

## Supporting Information:

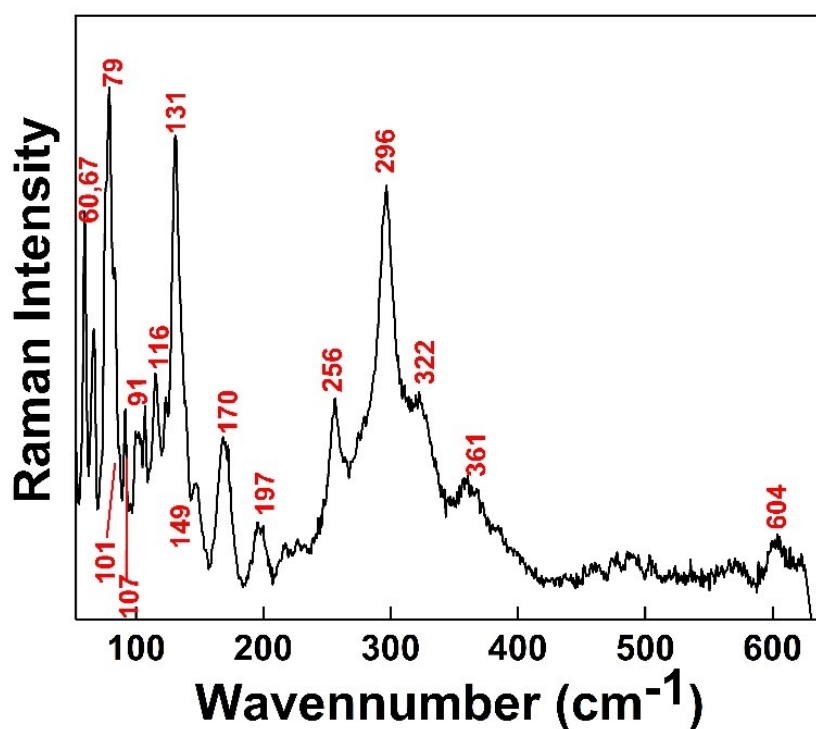

SI Figure 1. Raman spectrum of anhydrous  $\text{UF}_4$  (black trace) with 16 distinct bands between 50 and 610  $\text{cm}^{-1}$  and one broad band at 4300  $\text{cm}^{-1}$ . Band locations are identified in red. The spectrum was acquired with a 785 nm excitation laser.

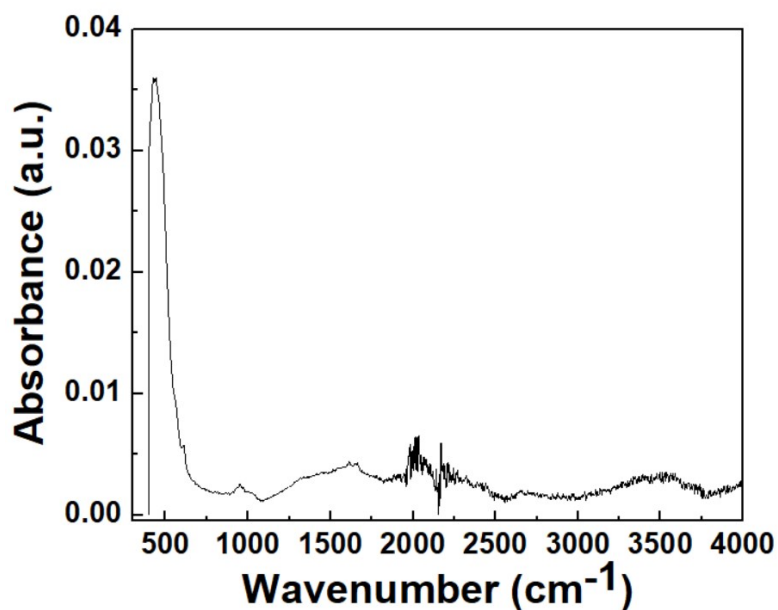

SI Figure 2. The infrared spectrum of anhydrous UF<sub>4</sub> is featureless and is consistent with UF<sub>4</sub> having no IR-active vibrational modes in the measured spectral range. The sharp feature near 500 cm<sup>-1</sup> is fluorescence and the sharp features between 2000 - 2200 cm<sup>-1</sup> are artifacts of the diamond ATR in the spectrometer.

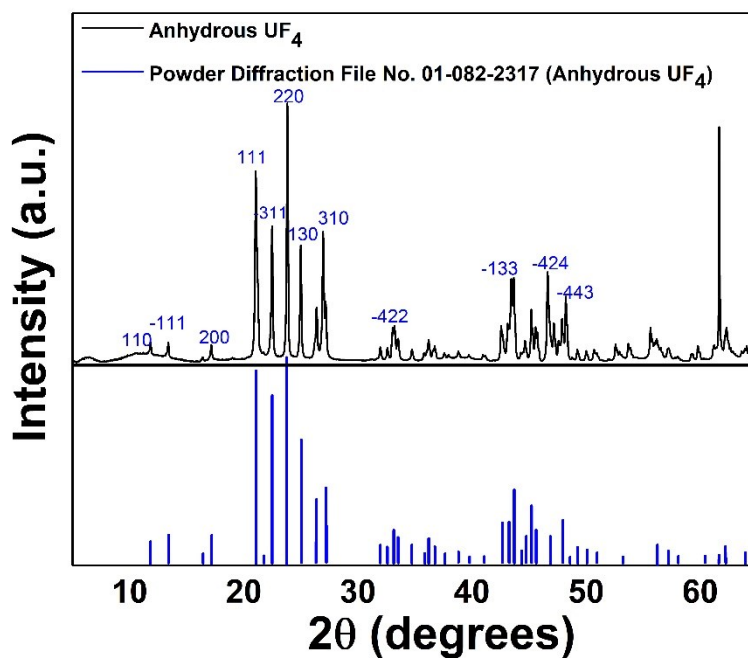

SI Figure 3. (Top): Powder X-ray diffraction pattern of anhydrous UF<sub>4</sub> (black trace) with Miller indices for select peaks (blue text). (Bottom): ICDD diffraction lines of UF<sub>4</sub> (Powder Diffraction File No. 01-082-2317).

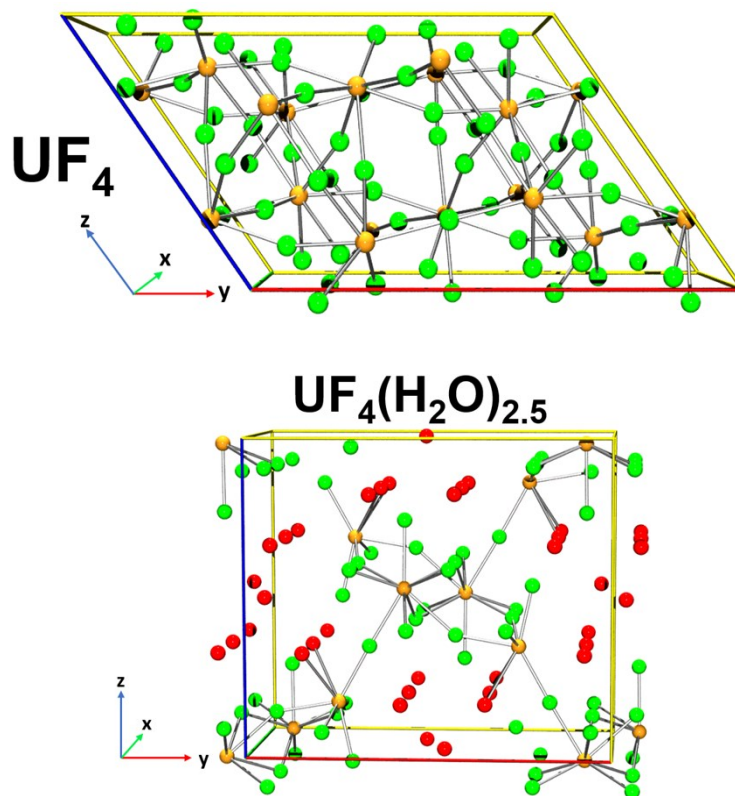

SI Figure 4. Ball and stick representations of the crystallographic structure within a single unit cell for anhydrous  $\text{UF}_4$  (top) and  $\text{UF}_4(\text{H}_2\text{O})_{2.5}$  (bottom). Yellow = uranium, green = fluorine, red = oxygen. Water hydrogens are omitted for clarity

SI Table 1. Crystallographic features of  $\text{UF}_4$  and  $\text{UF}_4(\text{H}_2\text{O})_{2.5}$

|                  | $\text{UF}_4$   | $\text{UF}_4(\text{H}_2\text{O})_{2.5}$ |
|------------------|-----------------|-----------------------------------------|
| Space Group      | $C2/c$ (No. 15) | $Pnma$ (No. 62)                         |
| U-F polyhedral   | $\text{UF}_8$   | $\text{UF}_9$                           |
| U-O-F polyhedral | -               | $\text{UO}_4\text{F}_5$                 |
| Density          | 6.7             | 4.754                                   |

### $^{19}\text{F}$ Magic Angle Spinning Nuclear Magnetic Resonance:

To probe the sharp peak observed in our  $^{19}\text{F}$  NMR measurements after  $\text{UF}_4$  had soaked in water, a small aliquot of solid sample was removed from the water and was analyzed by MAS NMR.  $^{19}\text{F}$  Magic Angle Spinning (MAS) NMR spectra were obtained at 11.7 T ( $^{19}\text{F}$  resonance frequency of 470.6 MHz) using a Varian NMR500 spectrometer and a 1.2 mm double-resonance UltraFast MAS NMR probe. The MAS NMR spectrum showed a series of spinning sidebands which are in close agreement with a broadened set of sidebands associated with uranyl fluoride –  $\text{UO}_2\text{F}_2(\text{H}_2\text{O})_{1.57}$  (SI Figures 7 and 8).<sup>1</sup> The close agreement between these spectra indicates that uranyl fluoride forms - albeit to a small extent - when  $\text{UF}_4$  is exposed to water. The broadening in all  $^{19}\text{F}$  MAS NMR spectra is likely due to the non-crystalline nature of the uranyl fluoride as has been observed previously.<sup>1</sup>

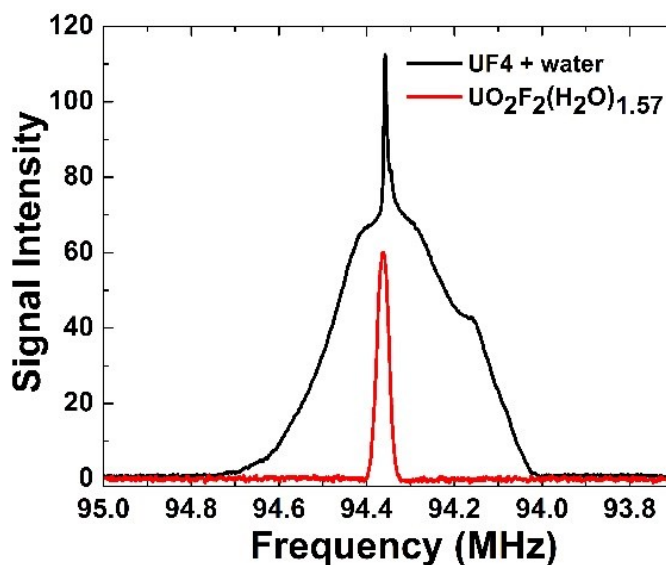

SI Figure 5  $^{19}\text{F}$  NMR spectra acquired at a probe height where the field homogeneity was optimal and at a frequency where fluorine bound to diamagnetic species is likely to be observed ( $\sim 94.3$  MHz). The black spectrum is a central sub-spectrum corresponding to one of the 11 subspectra obtained in a point-by-point method for a wet sample of  $\text{UF}_4$  acquired with a solid echo with pulse lengths of  $0.6\ \mu\text{s}$ , delay between pulses of  $25\ \mu\text{s}$ , wait time between scans of 4 ms and longer, and total number of scans equal to 20480. The spectrum in red was obtained for a commercial uranyl fluoride sample ( $\text{UO}_2\text{F}_2(\text{H}_2\text{O})_{1.57}$ ) using a solid echo with pulse lengths of  $3.0\ \mu\text{s}$ , delay between pulses of  $11\ \mu\text{s}$ , wait time between scans of 1 s and longer, and total number of scans equal to 1536.

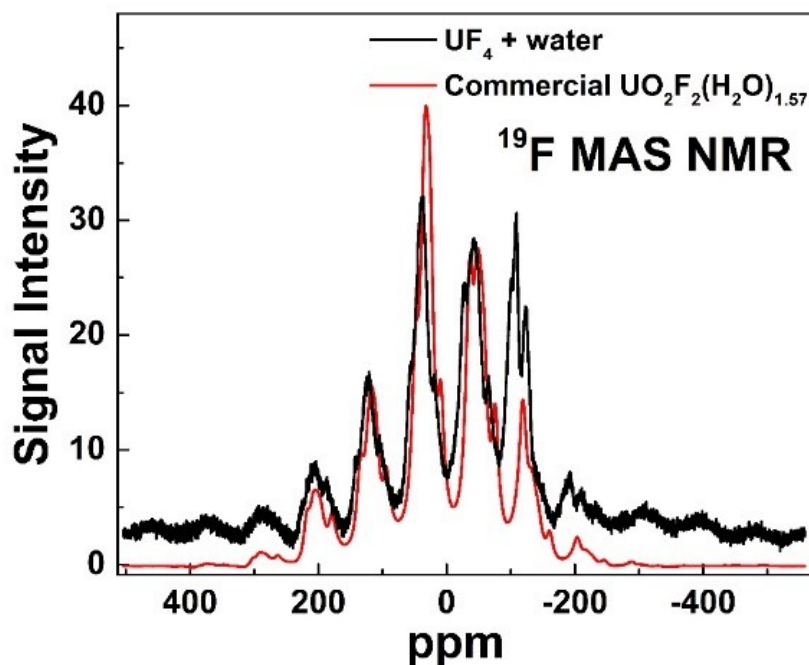

SI Figure 6.  $^{19}\text{F}$  MAS NMR spectra obtained from Hahn echo experiments with a spinning frequency of 40 kHz for a) small aliquot (3.9 mg) of  $\text{UF}_4$  sample that been exposed to water and left to stand for over a year. The pulse lengths in the echo were  $0.8\ \mu\text{s}$  and  $1.6\ \mu\text{s}$  for  $\pi/2$  and  $\pi$  pulses respectively. The delay between pulses was equal to one rotor period,  $25\ \mu\text{s}$ . The delay between scans was 8 s. The total number of scans was 2816 corresponding to a total experiment time of 6.3 hours; b) commercial  $\text{UO}_2\text{F}_2(\text{H}_2\text{O})_{1.57}$  (3.7 mg). The pulse lengths in the echo were  $1.7\ \mu\text{s}$  and  $3.4\ \mu\text{s}$  for  $\pi/2$  and  $\pi$  pulses respectively. The delay between pulses was equal to four rotor periods,  $100\ \mu\text{s}$ . The delay between scans was 10 s. The total number of scans was 256 corresponding to a total experiment time of 42.7 minutes. To make the comparison clearer, the data was processed using a line broadening of 5 kHz.

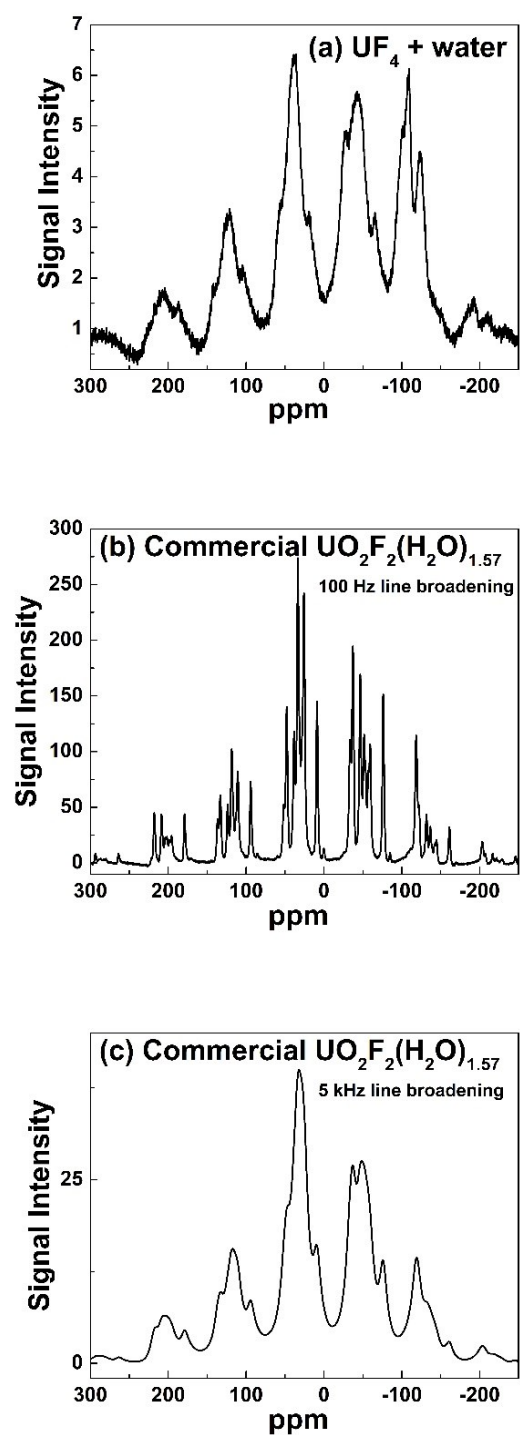

SI Figure 7.  $^{19}\text{F}$  MAS NMR spectra obtained for a)  $\text{UF}_4$  in water, b) commercial  $\text{UO}_2\text{F}_2(\text{H}_2\text{O})_{1.57}$  processed with 100 Hz line broadening, and c) commercial  $\text{UO}_2\text{F}_2(\text{H}_2\text{O})_{1.57}$  processed with 5 kHz line broadening. The data indicate that a small amount of  $\text{UO}_2\text{F}_2(\text{H}_2\text{O})_{1.57}$  forms during the  $\text{UF}_4$ -water reaction.

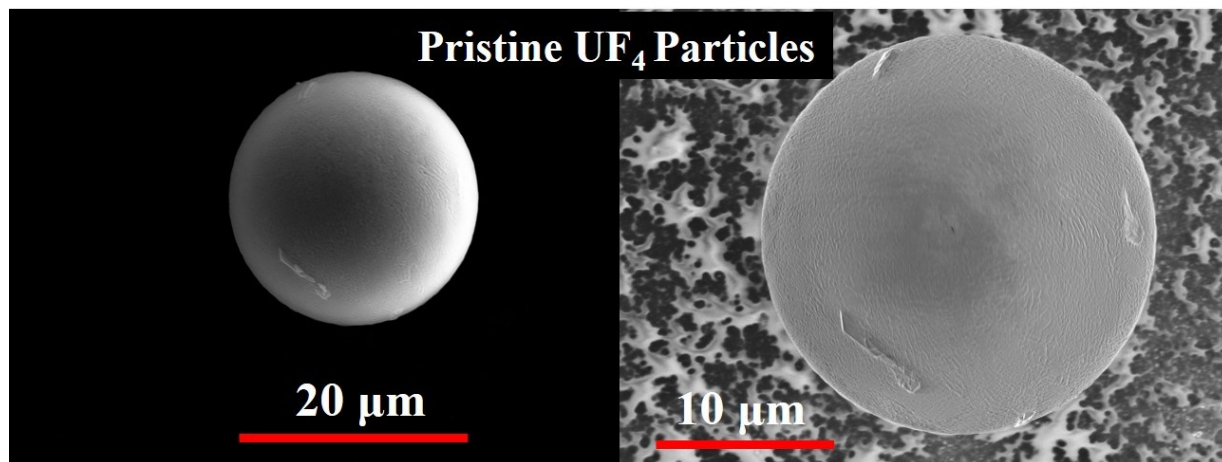

SI Figure 8. SEM images of commercial anhydrous  $\text{UF}_4$  before water exposure show that the dry pristine particles have spheroid morphology and a smooth surface.

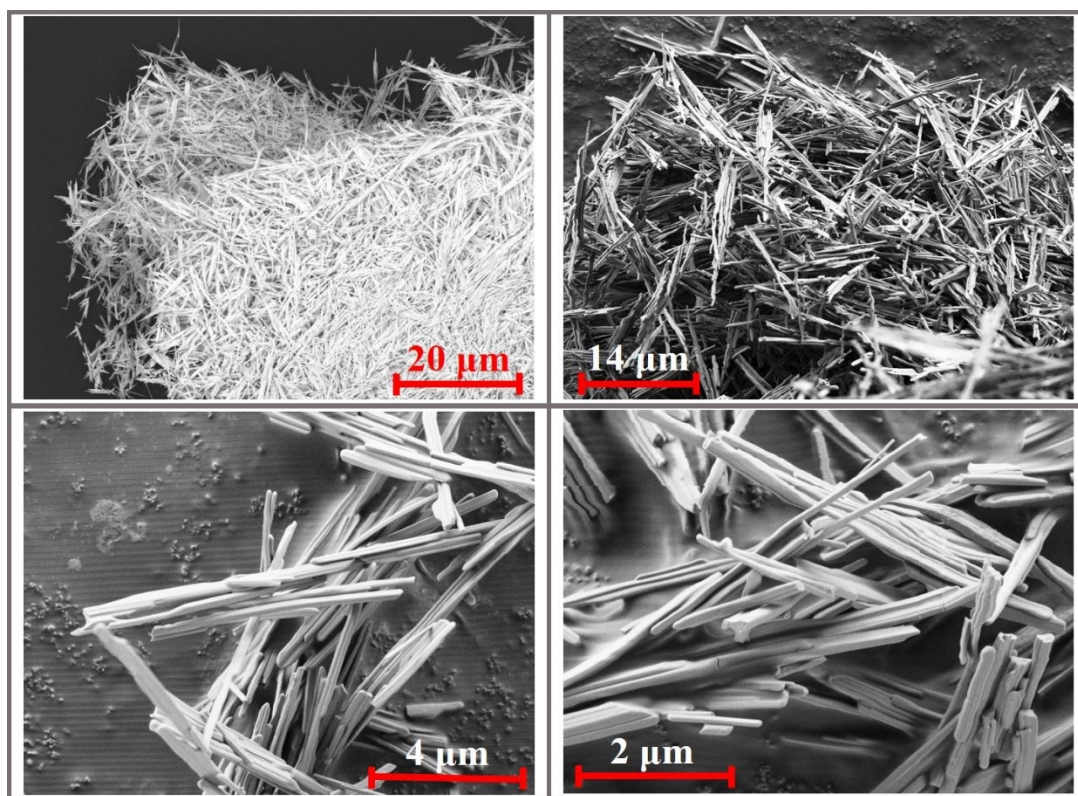

SI Figure 9. Scanning electron micrographs of  $\text{UF}_4$  hydrate ( $\text{UF}_4(\text{H}_2\text{O})_{2.5}$ ). This material was obtained after stirring anhydrous  $\text{UF}_4$  in deionized water for 1 day. The top images show the bulk material; the bottom images show details of the needle-like crystals.

## REFERENCES:

1. M. A. DeVore, C. A. Klug, M. R. Kriz, L. E. Roy and M. S. Wellons, *The Journal of Physical Chemistry A*, 2018, **122**, 6873-6878.
